# Supplementary material for: Rapidly Progressing Refractory Hodgkin Lymphoma: A Case Report and a Possible Explanation
Source: Hindawi journal article supplement (doi:10.1155/2016/7698624), 2016-01-01
Supplement: f1 [file 7698624.f1.pdf]

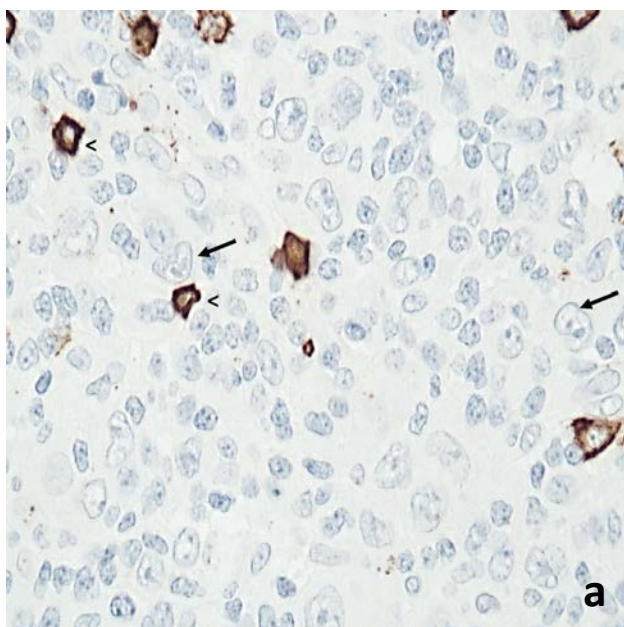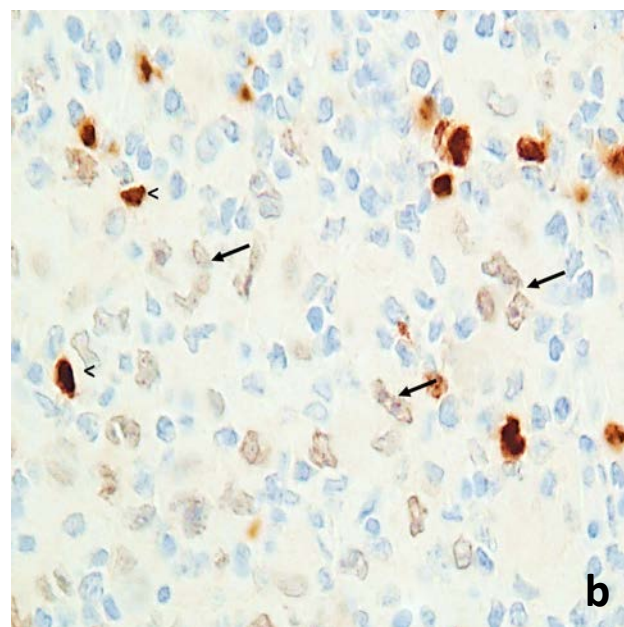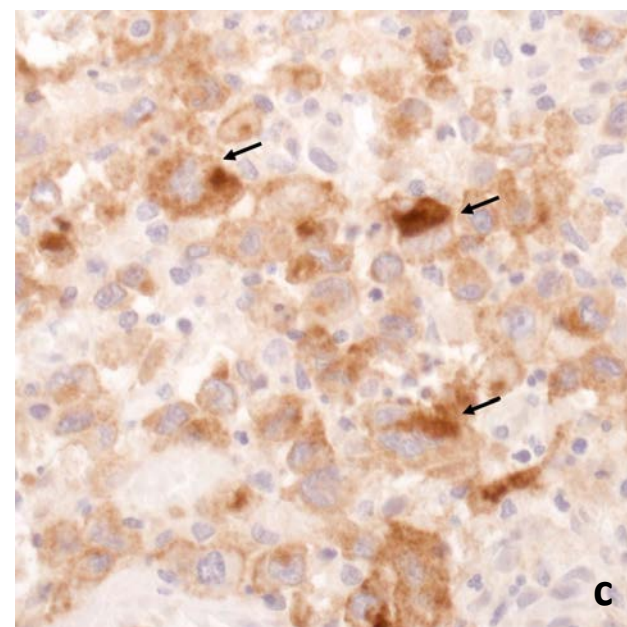

**Supplemental Figure 1**
